# Supplementary material
Source: ML conference proceedings conference paper supplement (https://openaccess.thecvf.com/content/ICCV2025/html/Pang_Augmented_and_Softened_ICCV_2025_paper.html)
Supplement: Supplementary file 1 [file Pang_Augmented_and_Softened_ICCV_2025_supplemental.pdf]

# Supplementary Material: Augmented and Softened Matching for Unsupervised Visible-Infrared Person Re-Identification

Zhiqi Pang<sup>1</sup>   Chunyu Wang<sup>1\*</sup>   Lingling Zhao<sup>1</sup>   Junjie Wang<sup>2</sup>

<sup>1</sup> Harbin Institute of Technology, China

<sup>2</sup> Nanjing Medical University, China

zqpang98@gmail.com, chunyu@hit.edu.cn, zhaoll@hit.edu.cn, junjiehit@163.com

## 1. Algorithm

### Algorithm 1 Augmented and softened matching

---

**Input:** Unlabeled data  $\{x_i^v\}_{i=1}^{N^v}$  and  $\{x_i^r\}_{i=1}^{N^r}$ , encoder parameterized by  $\theta_E$ , training *epochs* and *iters*.

- 1: **for**  $i = 1$  to *epochs* **do**
- 2:   Extract features of  $\{x_i^v\}_{i=1}^{N^v}$  and  $\{x_i^r\}_{i=1}^{N^r}$  with encoder
- 3:   Calculate cluster centroids based on Eq. 1 and Eq. 2 respectively
- 4:   **for**  $j = 1$  to *iters* **do**
- 5:     Optimize  $\theta_E$  to minimize the loss in Eq. 5
- 6:   **end for**
- 7: **end for**
- 8: Save the intra-modality pseudo-labels
- 9: **for**  $i = 1$  to *epochs* **do**
- 10:   Apply channel augmentation to  $\{x_i^v\}_{i=1}^{N^v}$  to obtain  $\{x_i^a\}_{i=1}^{N^a}$
- 11:   Extract features of  $\{x_i^v\}_{i=1}^{N^v}$ ,  $\{x_i^a\}_{i=1}^{N^a}$  and  $\{x_i^r\}_{i=1}^{N^r}$  with encoder
- 12:   Perform cross-modality augmented matching
- 13:   Perform soft-labels momentum update
- 14:   **for**  $j = 1$  to *iters* **do**
- 15:     Optimize  $\theta_E$  to minimize the loss in Eq. 18
- 16:   **end for**
- 17: **end for**
- 18: **return** Trained  $\theta_E$ .

---

## 2. Sensitivity Analysis

### 2.1. Update rate $\alpha$

$\alpha$  controls the update rate of the inter-modality soft pseudo-labels. When  $\alpha = 1.0$ , the soft-labels momentum update becomes ineffective, and the soft-labels are converted into hard-labels. In this case, the model only relies on the match-

\*Corresponding author: Chunyu Wang

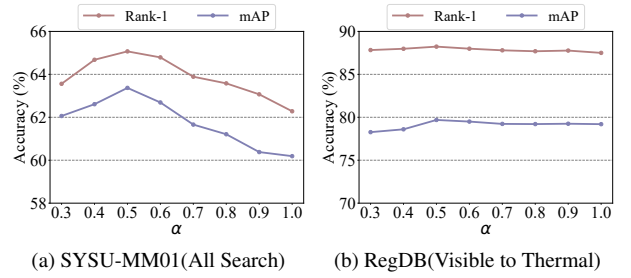

Figure 1. The effect of  $\alpha$  on model performance.

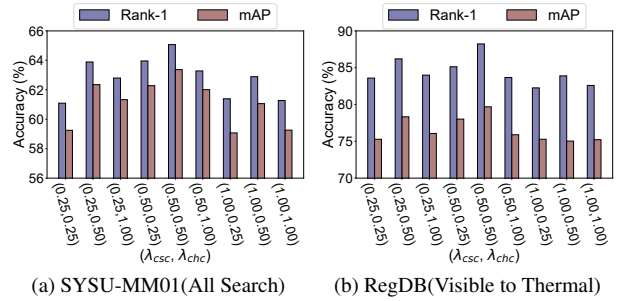

Figure 2. The effect of  $\lambda_{csc}$  and  $\lambda_{chc}$  on model performance.

ing results of the current epoch for optimization. As shown in Fig. 1, when  $\alpha = 0.5$ , the model achieves the best performance on both datasets. When  $\alpha = 1.0$ , the model's performance is poorer, which also validates the effectiveness of the soft-labels momentum update.

### 2.2. $\lambda_{csc}$ and $\lambda_{chc}$

As shown in Fig. 2, we observe that when  $\lambda_{csc} = 0.5$  and  $\lambda_{chc} = 0.5$ , the model achieves optimal performance on both datasets. When  $\lambda_{csc}$  and  $\lambda_{chc}$  are set to 0.25 or 1, the model performs poorly. This is because small weights limit the contribution of  $L_{csc}$  and  $L_{chc}$  to the model's optimization, while large weights may introduce excessive incorrect inter-modality optimization directions. Since the reliability of intra-modality pseudo-labels is generally higher

than that of inter-modality pseudo-labels, the optimization should still primarily rely on the more reliable supervision signals within each modality.
